# Supplementary material
Source: PubMed Central journal article supplement (PMC5544500)
Supplement: NIHMS881181-supplement-supplement_1.pdf [file NIHMS881181-supplement-supplement_1.pdf]

## Supplementary Materials:

Extended Data figures 1-5  
Extended Data table 1  
Supplementary tables S1-S2  
Auxiliary File #1-2

## Materials and Methods:

Yeast strains used in this report have the haploid S288c background and are derivatives of yRA strains reported in Anand *et. al*<sup>15</sup> (*hoΔ matΔ::hisG hmlΔ::hisG hmrΔ::ADE3 ura3Δ851 trp1Δ63 leu2Δ::KAN ade3::GAL10::HO*). A complete list of strains and plasmids used in this study is found in Table S1. The recipient sequences for strain yRA111 (*can1Δ::UR 5' intron HOcs::NAT*) contain the 5' sequences from the *URA3* gene (*UR*), an artificial split-intron with only the splice-donor site (5' SD) and the HO recognition site (HOcs) was built using a combination of Gibson assembly (NEB), *in vivo* plasmid-based recombination in yeast and plasmid rescue. The recipient cassette was PCR-amplified from the respective plasmid and integrated at the *CAN1* locus on Ch V by standard yeast transformation. Complete sequence information of the recipient and donors are presented in Supplementary Table 2. Various 108-bp donors, first designed *in silico*, were obtained as synthetic G-blocks (IDT) and assembled into an existing pRS314-based (*CEN4; TRP1*) plasmid containing the 3' splice-acceptor of the intron, the 3' sequence from the *URA3* gene (*A3*) and the *TRP1* marker, using *in vivo* recombination and plasmid rescue from a yeast host strain. The desired donor cassettes were amplified from the plasmid using Phusion (NEB) and integrated at the *FAU1* locus on Ch. V as described in Anand *et al.*<sup>15</sup> by standard yeast transformation. The list of recipient and donor sequences used in this study is listed in Table S2. Mutants were constructed using standard yeast gene deletion protocols. Pol3-01 and Pol2-4 mutants were created using Cas9 mediated gene targeting. A detail protocol for gene targeting with Cas9 is described at <http://www.nature.com/protocolexchange/protocols/5611>

BIR assay: BIR efficiencies were determined as described previously<sup>15</sup>. Briefly, cells were plated for individual colonies on YEPD + clonNat to retain the HOcs (which is marked with *NAT*). Approximately one million cells from individual colonies were appropriately diluted and simultaneously plated on YEPD plates to get the total cell count and on YEP-Gal plates for the induction HO of endonuclease. Cells that grew on YEP-Gal plates (DNA break-survivors) were counted and replica plated to plates lacking uracil to determine BIR frequencies. For each replicate, Ura<sup>+</sup> frequencies were calculated as the total Ura<sup>+</sup> cells that grew on plates lacking uracil over the total cells on YEPD. For measuring BIR, at least 2 replicates that comprise a few hundred colonies (ranging from ~100 to ~300) were analyzed. For those constructs in which viability (and therefore BIR) was less than 1 %, the number of cells plated was appropriately scaled up from a few thousand to about a few million. Total cells plated were deduced from cells growing on serially diluted down plates. The average of the replicates constituted mean BIR for that experiment. Experiments were independently repeated 3 times and averaged to arrive at experimental mean. Experimental means were statistically compared by one-tailed student's t-test and the standard error bars graphed using the inbuilt graphing software available in Graphpad Prism. \* indicate p value < 0.01 and \*\* indicate p value < 0.05. NHEJ efficiencies were determined by replica plating cells that grew on YEP-Gal plates onto clonNAT plates. Experiments in which Cas9 was used to

Cas9 was used to induce a chromosomal break were done as follows. First, a DSB was induced with HO by plating on YEP-Gal plates. Survivors that repaired their break by NHEJ were screened by replica plating on clonNAT plates. Individual survivors were sequenced and those that showed “CA” sequence insertion were selected for the Cas9 experiment. Galactose inducible Cas9 plasmids were transformed into the above NHEJ survivors. BIR assay were done essentially as described for HO except that cells were always maintained on 300ug/mL of hygromycin to retain the plasmid.

Analysis of recombination junctions: Sequence analyses to determine mismatch corrections were carried out using the alignment feature contained in the freely available DNA analyses software Serial Cloner 2.6.1 (Franck Perez, Serialbasics). First, the reconstituted *URA3* gene formed after BIR was PCR-amplified using primers that were positioned at the start and end of the *URA3* gene (Supplementary Methods). Individual PCR reactions were sequenced (Eton Bioscience Inc.) and aligned with the 108-bp recipient strand. If there were no changes to the recipient strand during BIR, the PCR product should show a perfect alignment with the recipient strand. Mismatch correction was manually curated for each of the individual sequences. For determining % correction, about 50 samples were sequence analyzed for each of the construct.

The fraction of allowable binding sites was calculated using custom written MATLAB program *allowable\_config* (See supplementary methods). *allowable\_config* takes as its input the window size, period of mismatch and total number of basepairs and calculates the fraction of binding sites without any mismatches and the fraction of allowable binding sites under the criteria in which the binding window is broken up into a region that cannot tolerate any mismatches (first 5 basepairs) and a region that can tolerate up to one mismatch (last 4 basepairs). We used a window size of  $w=9$ , period of mismatch of 1 to 60 and total number of basepairs of  $n=100,000$  for our calculations. *allowable\_config* generates a column vector of  $n$  zeroes and introduces ones corresponding to the mismatch period. The zeroes represent correct basepairings while the ones represent mismatches. *allowable\_config* considers every window of size  $w$  and assigns a pass or fail rating for each window. The program assigns pass or fail ratings for the case where there cannot be any mismatches in the window and for the case where there can be up to one mismatch in the window. The fraction of allowable binding sites is simply the ratio of the windows that pass to the total number of windows.

Table S1

| strain # | genotype                                                                                                                                                   | notes on donor                          |
|----------|------------------------------------------------------------------------------------------------------------------------------------------------------------|-----------------------------------------|
| yRA111   | MATa::DEL.HOcs::hisG ura3D851 trp1DEL.63<br>leu2DEL::KAN hmIDEL::hisG HMR::ADE3<br>ade3::GAL::HO can1DEL::UR intron_SD :: HOcs::NAT                        | Donor less strain                       |
| yRA253   | MATa::DEL.HOcs::hisG ura3D851 trp1DEL.63<br>leu2DEL::KAN hmIDEL::hisG HMR::ADE3<br>ade3::GAL::HO can1DEL::UR intron_SD :: HOcs::NAT,<br>intron_SA_A3::TRP1 | 0 bp mismatch<br>(100% identical donor) |
| yRA254   | MATa::DEL.HOcs::hisG ura3D851 trp1DEL.63<br>leu2DEL::KAN hmIDEL::hisG HMR::ADE3<br>ade3::GAL::HO can1DEL::UR intron_SD :: HOcs::NAT,<br>intron_SA_A3::TRP1 | 76% identical donor                     |
| yRA269   | MATa::DEL.HOcs::hisG ura3D851 trp1DEL.63<br>leu2DEL::KAN hmIDEL::hisG HMR::ADE3<br>ade3::GAL::HO can1DEL::UR intron_SD :: HOcs::NAT,<br>intron_SA_A3::TRP1 | 68% identical donor                     |
| yRA270   | MATa::DEL.HOcs::hisG ura3D851 trp1DEL.63<br>leu2DEL::KAN hmIDEL::hisG HMR::ADE3<br>ade3::GAL::HO can1DEL::UR intron_SD :: HOcs::NAT,<br>intron_SA_A3::TRP1 | 85% identical donor                     |
| yRA271   | MATa::DEL.HOcs::hisG ura3D851 trp1DEL.63<br>leu2DEL::KAN hmIDEL::hisG HMR::ADE3<br>ade3::GAL::HO can1DEL::UR intron_SD :: HOcs::NAT,<br>intron_SA_A3::TRP1 | 95% identical donor                     |
| yRA272   | MATa::DEL.HOcs::hisG ura3D851 trp1DEL.63<br>leu2DEL::KAN hmIDEL::hisG HMR::ADE3<br>ade3::GAL::HO can1DEL::UR intron_SD :: HOcs::NAT,<br>intron_SA_A3::TRP1 | 63rd bp mismatched                      |
| yRA273   | MATa::DEL.HOcs::hisG ura3D851 trp1DEL.63<br>leu2DEL::KAN hmIDEL::hisG HMR::ADE3<br>ade3::GAL::HO can1DEL::UR intron_SD :: HOcs::NAT,<br>intron_SA_A3::TRP1 | 9th bp mismatched                       |
| yRA274   | MATa::DEL.HOcs::hisG ura3D851 trp1DEL.63<br>leu2DEL::KAN hmIDEL::hisG HMR::ADE3<br>ade3::GAL::HO can1DEL::UR intron_SD :: HOcs::NAT,<br>intron_SA_A3::TRP1 | 4th bp mismatched                       |
| yRA275   | MATa::DEL.HOcs::hisG ura3D851 trp1DEL.63<br>leu2DEL::KAN hmIDEL::hisG HMR::ADE3<br>ade3::GAL::HO can1DEL::UR intron_SD :: HOcs::NAT,<br>intron_SA_A3::TRP1 | every 9th bp mismatched                 |
| yRA278   | MATa::DEL.HOcs::hisG ura3D851 trp1DEL.63<br>leu2DEL::KAN hmIDEL::hisG HMR::ADE3                                                                            | every 7th bp mismatched                 |

Table S1

|        |                                                                                                                                                            |                                          |
|--------|------------------------------------------------------------------------------------------------------------------------------------------------------------|------------------------------------------|
|        | ade3::GAL::HO can1DEL::UR intron_SD :: HOcs::NAT,<br>intron_SA_A3::TRP1                                                                                    |                                          |
| yRA279 | MATa::DEL.HOcs::hisG ura3D851 trp1DEL.63<br>leu2DEL::KAN hmIDEL::hisG HMR::ADE3<br>ade3::GAL::HO can1DEL::UR intron_SD :: HOcs::NAT,<br>intron_SA_A3::TRP1 | every 8th bp<br>mismatched               |
| yRA280 | MATa::DEL.HOcs::hisG ura3D851 trp1DEL.63<br>leu2DEL::KAN hmIDEL::hisG HMR::ADE3<br>ade3::GAL::HO can1DEL::UR intron_SD :: HOcs::NAT,<br>intron_SA_A3::TRP1 | every 10th bp<br>mismatched              |
| yAB277 | MATa::DEL.HOcs::hisG ura3D851 trp1DEL.63<br>leu2DEL::KAN hmIDEL::hisG HMR::ADE3<br>ade3::GAL::HO can1DEL::UR intron_SD :: HOcs::NAT,<br>intron_SA_A3::TRP1 | 54th bp<br>mismatch                      |
| yAB278 | MATa::DEL.HOcs::hisG ura3D851 trp1DEL.63<br>leu2DEL::KAN hmIDEL::hisG HMR::ADE3<br>ade3::GAL::HO can1DEL::UR intron_SD :: HOcs::NAT,<br>intron_SA_A3::TRP1 | 36th and 72nd<br>mismatch                |
| yAB279 | MATa::DEL.HOcs::hisG ura3D851 trp1DEL.63<br>leu2DEL::KAN hmIDEL::hisG HMR::ADE3<br>ade3::GAL::HO can1DEL::UR intron_SD :: HOcs::NAT,<br>intron_SA_A3::TRP1 | 27th 54th and<br>81st mismatch           |
| yAB280 | MATa::DEL.HOcs::hisG ura3D851 trp1DEL.63<br>leu2DEL::KAN hmIDEL::hisG HMR::ADE3<br>ade3::GAL::HO can1DEL::UR intron_SD :: HOcs::NAT,<br>intron_SA_A3::TRP1 | 22nd, 44th,<br>66th and 88th<br>mismatch |
| yAB281 | MATa::DEL.HOcs::hisG ura3D851 trp1DEL.63<br>leu2DEL::KAN hmIDEL::hisG HMR::ADE3<br>ade3::GAL::HO can1DEL::UR intron_SD :: HOcs::NAT,<br>intron_SA_A3::TRP1 | Every 11th bp<br>mismatched              |
| yAB282 | MATa::DEL.HOcs::hisG ura3D851 trp1DEL.63<br>leu2DEL::KAN hmIDEL::hisG HMR::ADE3<br>ade3::GAL::HO can1DEL::UR intron_SD :: HOcs::NAT,<br>intron_SA_A3::TRP1 | Every 12th bp<br>mismatched              |
| yAB283 | MATa::DEL.HOcs::hisG ura3D851 trp1DEL.63<br>leu2DEL::KAN hmIDEL::hisG HMR::ADE3<br>ade3::GAL::HO can1DEL::UR intron_SD :: HOcs::NAT,<br>intron_SA_A3::TRP1 | Every 13th bp<br>mismatched              |
| yAB284 | MATa::DEL.HOcs::hisG ura3D851 trp1DEL.63<br>leu2DEL::KAN hmIDEL::hisG HMR::ADE3<br>ade3::GAL::HO can1DEL::UR intron_SD :: HOcs::NAT,<br>intron_SA_A3::TRP1 | Every 9th with<br>transition<br>mutation |
| yRA317 | MATa::DEL.HOcs::hisG ura3D851 trp1DEL.63<br>leu2DEL::KAN hmIDEL::hisG HMR::ADE3                                                                            | every 2nd bp<br>mismatched               |

Table S1

|        |                                                                                                                                                            |                                                                                      |
|--------|------------------------------------------------------------------------------------------------------------------------------------------------------------|--------------------------------------------------------------------------------------|
|        | ade3::GAL::HO can1DEL::UR intron_SD :: HOcs::NAT,<br>intron_SA_A3::TRP1                                                                                    |                                                                                      |
| yRA318 | MATa::DEL.HOcs::hisG ura3D851 trp1DEL.63<br>leu2DEL::KAN hmIDEL::hisG HMR::ADE3<br>ade3::GAL::HO can1DEL::UR intron_SD :: HOcs::NAT,<br>intron_SA_A3::TRP1 | every 3rd bp<br>mismatched                                                           |
| yRA319 | MATa::DEL.HOcs::hisG ura3D851 trp1DEL.63<br>leu2DEL::KAN hmIDEL::hisG HMR::ADE3<br>ade3::GAL::HO can1DEL::UR intron_SD :: HOcs::NAT,<br>intron_SA_A3::TRP1 | every 4th bp<br>mismatched                                                           |
| yRA320 | MATa::DEL.HOcs::hisG ura3D851 trp1DEL.63<br>leu2DEL::KAN hmIDEL::hisG HMR::ADE3<br>ade3::GAL::HO can1DEL::UR intron_SD :: HOcs::NAT,<br>intron_SA_A3::TRP1 | every 5th bp<br>mismatched                                                           |
| yRA321 | MATa::DEL.HOcs::hisG ura3D851 trp1DEL.63<br>leu2DEL::KAN hmIDEL::hisG HMR::ADE3<br>ade3::GAL::HO can1DEL::UR intron_SD :: HOcs::NAT,<br>intron_SA_A3::TRP1 | every 6th bp<br>mismatched                                                           |
| yRA322 | MATa::DEL.HOcs::hisG ura3D851 trp1DEL.63<br>leu2DEL::KAN hmIDEL::hisG HMR::ADE3<br>ade3::GAL::HO can1DEL::UR intron_SD :: HOcs::NAT,<br>intron_SA_A3::TRP1 | every 9th bp<br>mismatched<br>starting at 5th<br>nucleotide                          |
| yRA323 | MATa::DEL.HOcs::hisG ura3D851 trp1DEL.63<br>leu2DEL::KAN hmIDEL::hisG HMR::ADE3<br>ade3::GAL::HO can1DEL::UR intron_SD :: HOcs::NAT,<br>intron_SA_A3::TRP1 | every 9th bp<br>mismatched<br>and tripple<br>mismatches at<br>9th, 10th and<br>11th  |
| yRA324 | MATa::DEL.HOcs::hisG ura3D851 trp1DEL.63<br>leu2DEL::KAN hmIDEL::hisG HMR::ADE3<br>ade3::GAL::HO can1DEL::UR intron_SD :: HOcs::NAT,<br>intron_SA_A3::TRP1 | every 9th bp<br>mismatched<br>and tripple<br>mismatches at<br>18th, 19th and<br>20th |
| yRA325 | MATa::DEL.HOcs::hisG ura3D851 trp1DEL.63<br>leu2DEL::KAN hmIDEL::hisG HMR::ADE3<br>ade3::GAL::HO can1DEL::UR intron_SD :: HOcs::NAT,<br>intron_SA_A3::TRP1 | 1 nt tail                                                                            |
| yRA326 | MATa::DEL.HOcs::hisG ura3D851 trp1DEL.63<br>leu2DEL::KAN hmIDEL::hisG HMR::ADE3<br>ade3::GAL::HO can1DEL::UR intron_SD :: HOcs::NAT,<br>intron_SA_A3::TRP1 | 2nt tail                                                                             |
| yRA327 | MATa::DEL.HOcs::hisG ura3D851 trp1DEL.63<br>leu2DEL::KAN hmIDEL::hisG HMR::ADE3<br>ade3::GAL::HO can1DEL::UR intron_SD :: HOcs::NAT,                       | 3 nt tail                                                                            |

Table S1

|        |                                                                                                                                                            |                                                              |
|--------|------------------------------------------------------------------------------------------------------------------------------------------------------------|--------------------------------------------------------------|
|        | intron_SA_A3::TRP1                                                                                                                                         |                                                              |
| yRA340 | MATa::DEL.HOcs::hisG ura3D851 trp1DEL.63<br>leu2DEL::KAN hmIDEL::hisG HMR::ADE3<br>ade3::GAL::HO can1DEL::UR intron_SD :: HOcs::NAT,<br>intron_SA_A3::TRP1 | donor with 54<br>bp homology                                 |
| yRA341 | MATa::DEL.HOcs::hisG ura3D851 trp1DEL.63<br>leu2DEL::KAN hmIDEL::hisG HMR::ADE3<br>ade3::GAL::HO can1DEL::UR intron_SD :: HOcs::NAT,<br>intron_SA_A3::TRP1 | donor with 27<br>bp homology                                 |
| yRA342 | MATa::DEL.HOcs::hisG ura3D851 trp1DEL.63<br>leu2DEL::KAN hmIDEL::hisG HMR::ADE3<br>ade3::GAL::HO can1DEL::UR intron_SD :: HOcs::NAT,<br>intron_SA_A3::TRP1 | donor with 54<br>bp homology;<br>mismatched at<br>every 9th  |
| yRA343 | MATa::DEL.HOcs::hisG ura3D851 trp1DEL.63<br>leu2DEL::KAN hmIDEL::hisG HMR::ADE3<br>ade3::GAL::HO can1DEL::UR intron_SD :: HOcs::NAT,<br>intron_SA_A3::TRP1 | donor with 27<br>bp homology ;<br>mismatched at<br>every 9th |
| yRA344 | MATa::DEL.HOcs::hisG ura3D851 trp1DEL.63<br>leu2DEL::KAN hmIDEL::hisG HMR::ADE3<br>ade3::GAL::HO can1DEL::UR intron_SD :: HOcs::NAT,<br>intron_SA_A3::TRP1 | yRA254 strain<br>with "CA" NEJ<br>insertion at the<br>Hocs   |
| yRA345 | MATa::DEL.HOcs::hisG ura3D851 trp1DEL.63<br>leu2DEL::KAN hmIDEL::hisG HMR::ADE3<br>ade3::GAL::HO can1DEL::UR intron_SD :: HOcs::NAT,<br>intron_SA_A3::TRP1 | 3 nt insertion at<br>9th position                            |
| yRA346 | MATa::DEL.HOcs::hisG ura3D851 trp1DEL.63<br>leu2DEL::KAN hmIDEL::hisG HMR::ADE3<br>ade3::GAL::HO can1DEL::UR intron_SD :: HOcs::NAT,<br>intron_SA_A3::TRP1 | 3 nt deletion at<br>9th position                             |
| yRA347 | MATa::DEL.HOcs::hisG ura3D851 trp1DEL.63<br>leu2DEL::KAN hmIDEL::hisG HMR::ADE3<br>ade3::GAL::HO can1DEL::UR intron_SD :: HOcs::NAT,<br>intron_SA_A3::TRP1 | 1 nt insertion at<br>9th position                            |
| yRA348 | MATa::DEL.HOcs::hisG ura3D851 trp1DEL.63<br>leu2DEL::KAN hmIDEL::hisG HMR::ADE3<br>ade3::GAL::HO can1DEL::UR intron_SD :: HOcs::NAT,<br>intron_SA_A3::TRP1 | 1 nt insertion at<br>9th position                            |
| yRA349 | MATa::DEL.HOcs::hisG ura3D851 trp1DEL.63<br>leu2DEL::KAN hmIDEL::hisG HMR::ADE3<br>ade3::GAL::HO can1DEL::UR intron_SD :: HOcs::NAT,<br>intron_SA_A3::TRP1 | 3 nt insertion at<br>54th position                           |
| yRA350 | MATa::DEL.HOcs::hisG ura3D851 trp1DEL.63<br>leu2DEL::KAN hmIDEL::hisG HMR::ADE3<br>ade3::GAL::HO can1DEL::UR intron_SD :: HOcs::NAT,                       | 3 nt deletion at<br>54th position                            |

Table S1

|        |                     |  |
|--------|---------------------|--|
|        | intron_SA_A3::TRP1  |  |
| yRA288 | yRA253; mlh1::LEU2  |  |
| yRA289 | yRA254; mlh1::LEU2  |  |
| yRA290 | yRA273; mlh1::LEU2  |  |
| yRA291 | yRA274; mlh1::LEU2  |  |
| yRA292 | yRA275; mlh1::LEU2  |  |
| yRA293 | yRA253; pms1::LEU2  |  |
| yRA294 | yRA254; pms1::LEU2  |  |
| yRA295 | yRA273; pms1::LEU2  |  |
| yRA296 | yRA274; pms1::LEU2  |  |
| yRA297 | yRA275; pms1::LEU2  |  |
| yAB256 | yRA253 ; msh2::HPH  |  |
| yAB257 | yRA274 ; msh2::HPH  |  |
| yAB258 | yRA275 ; msh2::HPH  |  |
| yAB259 | yRA253 ; rad51::HPH |  |
| yAB260 | yRA274 ; rad51::HPH |  |
| yAB261 | yRA275 ; rad51::HPH |  |
| yAB271 | yRA319 ; rad51::HPH |  |
| yAB272 | yRA320 ; rad51::HPH |  |
| yAB273 | yRA321 ; rad51::HPH |  |
| yAB274 | yRA322 ; rad51::HPH |  |
| yAB268 | yRA253 ; rad1::LEU2 |  |
| yAB269 | yRA274 ; rad1::LEU2 |  |
| yAB270 | yRA275 ; rad1::LEU2 |  |
| yAB285 | yRA253 ; pol3-01    |  |
| yAB286 | yRA274 ; pol3-01    |  |
| yAB287 | yRA275 ; pol3-01    |  |
| yAB292 | yRA253 ; pol2-4     |  |
| yAB293 | yRA274 ; pol2-4     |  |

Table S1

|        |                                                                                                           |  |
|--------|-----------------------------------------------------------------------------------------------------------|--|
| yAB294 | yRA275 ; pol2-4                                                                                           |  |
| yAB317 | yRA253 ; exo1::HPH                                                                                        |  |
| yAB318 | yRA274 ; exo1::HPH                                                                                        |  |
| yAB319 | yRA275 ; exo1::HPH                                                                                        |  |
| yRA310 | yRA253 selected for "CA" NEJ Insertion at HO cut site (yRA300); transformed the bRA74                     |  |
| yRA311 | yRA274 selected for "CA" NEJ Insertion at HO cut site (yRA301); transformed the bRA74                     |  |
| yRA312 | yRA275 selected for "CA" NEJ Insertion at HO cut site (yRA302); transformed the bRA74                     |  |
| yAB321 | yRA253 msh2::HPH selected for "CA" NEJ Insertion at HO cut site (yRA331); transformed with plasmid bRA134 |  |
| yAB322 | yRA274 msh2::HPH selected for "CA" NEJ Insertion at HO cut site (yRA332); transformed with plasmid bRA134 |  |
| yAB323 | yRA275 msh2::HPH selected for "CA" NEJ Insertion at HO cut site (yRA333); transformed with plasmid bRA134 |  |
| yAB328 | yRA253 ; msh6::LEU                                                                                        |  |
| yAB329 | yRA274 ; msh6::LEU                                                                                        |  |
| yAB330 | yRA275 ; msh6::LEU                                                                                        |  |

| plasmids | features                                                                              | repair template                                                                                  |
|----------|---------------------------------------------------------------------------------------|--------------------------------------------------------------------------------------------------|
| bRA74    | Cen vector HPH:pGAL1-Cas9 (guide CTGGTTTTGGTTTTGTAG AG); cutting yields a 34 nt tail  | NA                                                                                               |
| bRA134   | Cen vector LEU2:pGAL1-Cas9 (guide CTGGTTTTGGTTTTGTAG AG); cutting yields a 34 nt tail | NA                                                                                               |
| bRA114   | Cas9 vector used to make Pol3-01 (guide TCCTTTGATATCGAGTGT GC)                        | CAGCTCCATTGCGTATCA<br>TGTCCTTTGCTATCGCGT<br>GTGCTGGTAGGATTGGC<br>GTCTTTCCGGAACCTGAA<br>TACGATCCC |



Table S1

|        |                                                                       |                                                                                                                        |
|--------|-----------------------------------------------------------------------|------------------------------------------------------------------------------------------------------------------------|
| bRA124 | Cas9 vector used to make pol2-4 allele ( guide TATCAAATGCCATTACCA CA) | TTCATTGAAGATACTAGG<br>AAAATTGCATTTGCCGAT<br>CCAGTAGTGATGGCTTTC<br>GCAATAGCTACCACGAAG<br>CCGCCTTTAAAATTCCCG<br>GATTCCGC |
|--------|-----------------------------------------------------------------------|------------------------------------------------------------------------------------------------------------------------|

Table S2

|                                             |                                                                                                                   |
|---------------------------------------------|-------------------------------------------------------------------------------------------------------------------|
| Recipient sequence                          | TAATATGGACTAAAGGAGGCTTTTCTGCAGGTCGATCTAAATAAATTCGTTTTCAA<br>TGATTAATAATAGCATAGTCGGGTTTTCTTTTAGTTTCAGCTTTCGGCAACA  |
| 100% homology donor                         | TAATATGGACTAAAGGAGGCTTTTCTGCAGGTCGATCTAAATAAATTCGTTTTCAA<br>TGATTAATAATAGCATAGTCGGGTTTTCTTTTAGTTTCAGCTTTCGGCAACA  |
| 68% homology donor                          | TATTATCGACGTAACCAGGCTTTTCACCAGGTCATCTAAATGGGTTGCTTCTGG<br>ATTATAAAGTTATAGTAGTCAGGTAGGTCCGTGAGTTTCAGCCCACCCCAACA   |
| 76% homology donor                          | TATTATCGACTTAAGCAGGCTTTTCAGCAGGCGGATCTAATAAAATTCGTTTCGCA<br>ATGATAAAAATAGCATACTCGGGCAGGTCCGTGAGTTTCTGCCACCCCAACA  |
| 85% homology donor                          | TAATATTGACTAAATGAGTCTTTTCAGCTGGTCGATCGAAAGAAATTCGTTTTCAA<br>TTATTAGAATAGCATTGTCGGGTTATTCTTTGAGTTTGAGCTTACCTCAACA  |
| 95% homology donor                          | TAATATGGACTAAAGGAGGCTTTTCAGCAGGTCGATCTAAATAAATTCGTTTCTCA<br>ATTATTAATAATAGCATAGTCGGGTTTTCTTTGAGTTTCAGCTTACCGCAACA |
| 1 mismatch at the 63 <sup>rd</sup> position | TAATATGGACTAAAGGAGGCTTTTCTGCAGGTCGATCTAAATAAAGTCGTTTTCA<br>ATGATTAATAATAGCATAGTCGGGTTTTCTTTTAGTTTCAGCTTTCGGCAACA  |
| 1 mismatch at the 9 <sup>th</sup> position  | TAATATGGACTAAAGGAGGCTTTTCTGCAGGTCGATCTAAATAAATTCGTTTTCAA<br>TGATTAATAATAGCATAGTCGGGTTTTCTTTTAGTTTCAGCTTTCGGCAACA  |
| 1 mismatch at the 4 <sup>th</sup> position  | TAATATGGACTAAAGGAGGCTTTTCTGCAGGTCGATCTAAATAAATTCGTTTTCAA<br>TGATTAATAATAGCATAGTCGGGTTTTCTTTTAGTTTCAGCTTTCGGCGACA  |
| every 2 <sup>nd</sup> position mismatched   | AATTTTCGTCAATACGTGCCATATGTCCTGCTGGTTGTTATTTATTACCTATACTA<br>AGTTAATATTTGGAACTGGCGATATACATATTGATACTGGTATGCCCTAGA   |
| every 3 <sup>rd</sup> position mismatched   | AAAAATCGAGTATAGCAGCCTATTGTGGAGCTCCATGTATATTAATCCTTATCTA<br>TCATAAATATTGCTTACTCCGGATTATCATTAAAGATTGAGGTTACCCCATCA  |
| every 4 <sup>th</sup> position mismatched   | AAATTTGGTCTATAGGTGGCATTGTTGCTGGTGGATGTAATTAATTTCTTTACAA<br>AGATAAAATTAGGATACTCGCGTTATTCAATTTGTTACAGGTTTGCGCTACA   |
| every 5 <sup>th</sup> position mismatched   | TAAAATGGTCTAATGGAGCCTTTACTGCTGGTCCATCTTAATATATTCTTTTGAA<br>TGTTTAATATAGGATAGACGGGATTTGTTTTGTTTGAGCTATCCGGAACA     |
| every 6 <sup>th</sup> position              | AAATATCGACTATAGGAGCCTTTTGTGCAGCTCGATGTAAATTAATTCCTTTTCTA<br>TGATAAAAATTGCATACTCGGGATTTTCATTTAGATTTCAGGTTTCCCAACA  |

Table S2

|                                                                                                                                |                                                                                                                    |
|--------------------------------------------------------------------------------------------------------------------------------|--------------------------------------------------------------------------------------------------------------------|
| mismatched                                                                                                                     |                                                                                                                    |
| every 7 <sup>th</sup> position mismatched                                                                                      | TAAAATGGACAAAAGGACGCTTTTGTGCAGGACGATCTTAATAAAATCGTTTACA<br>ATGAATAAAATTGCATAGACGGGTTATTCTTTAAGTTTCTGCTTTCGGCAACA   |
| every 8 <sup>th</sup> position mismatched                                                                                      | TAATTTGGACTATAGGAGGCATTTCTGCTGGTTCGATGTAAATAATTTTCGTTTACAA<br>TGATAAAAATAGGATAGTCGCGTTTTTCATTTAGTTACAGCTTTCGGCAACA |
| every 9 <sup>th</sup> position mismatched                                                                                      | AAATATGGAGTAAAGGAGCCTTTTCTGGAGGTCGATGTAAATAAAATCGTTTTCT<br>ATGATTAATATAGCATACTCGGGTTTATCTTTTAGATTACAGCTTACCGCAACA  |
| every 10 <sup>th</sup> position mismatched                                                                                     | TAATATGGTCTAAAGGAGCCTTTTCTGCTGGTTCGATCTTAATAAATTCCTTTTCAA<br>TGTTTAAAATAGGATAGTCGGGATTTTCTTTTTGTTTCAGCTATCCGCAACA  |
| every 11 <sup>th</sup> position mismatched                                                                                     | TAATATGGAGTAAAGGAGGCATTTCTGCAGGACGATCTAAATTAATTCGTTTTGA<br>ATGATTAATTAGCATAGTCCGGTTTTTCTTATAGTTTCAGCATTCCGCAACA    |
| every 12 <sup>th</sup> position mismatched                                                                                     | TAATATGGACTATAGGAGGCTTTTGTGCAGGTCGATGTAAATAAATTCCTTTTCAA<br>TGATAAAAATAGCATACTCGGGTTTTTCATTTAGTTTCAGGTTTCCGCAACA   |
| every 13 <sup>th</sup> position mismatched                                                                                     | TAATTTGGACTAAAGGACGCTTTTCTGCAGCTCGATCTAAATATATTCGTTTTCAA<br>AGATTAATAATAGCTTAGTCGGGTTTTACTTTTAGTTTCACCTTTCGGCAACA  |
| every 9 <sup>th</sup> position mismatched starting at the 5 <sup>th</sup>                                                      | TAATTTGGACTAATGGAGGCTTATCTGCAGGACGATCTAATTAATTCGATTTCAA<br>TGTTTAAAATACCATAGTCGCGTTTTTCTATTAGTTTCTGCTTTCGGGAACA    |
| every 9 <sup>th</sup> position mismatched, and triple mismatches at 9 <sup>th</sup> , 10 <sup>th</sup> , and 11 <sup>th</sup>  | AAATATGGAGTAAAGGAGCCTTTTCTGGAGGTCGATGTAAATAAAATCGTTTTCT<br>ATGATTAATATAGCATACTCGGGTTTATCTTTTAGATTACGCAAACCGCAACA   |
| every 9 <sup>th</sup> position mismatched, and triple mismatches at 18 <sup>th</sup> , 19 <sup>th</sup> , and 20 <sup>th</sup> | AAATATGGAGTAAAGGAGCCTTTTCTGGAGGTCGATGTAAATAAAATCGTTTTCT<br>ATGATTAATATAGCATACTCGGGTTTATCTTTTTCATTCAGCTTACCGCAACA   |
| every 9 <sup>th</sup> position mismatched                                                                                      | CAATATGGATTAAGGAGACTTTTCTGTAGGTCGATTTAAATAAACTCGTTTTCGA<br>TGATTAAGATAGCATAATCGGGTTTCTTTTTAGCTTCAGCTTCCGCAACA      |

Table S2

|                                                                                                 |                                                                                                                     |
|-------------------------------------------------------------------------------------------------|---------------------------------------------------------------------------------------------------------------------|
| (transition)                                                                                    |                                                                                                                     |
| 1 bp tail<br>(mismatch at the 1 <sup>st</sup> position)                                         | TAATATGGACTAAAGGAGGCTTTTCTGCAGGTCGATCTAAATAAATTCGTTTTCAA<br>TGATTAATAATAGCATAGTCGGGTTTTCTTTTAGTTTCAGCTTTCCGCAACT    |
| 2 bp tail<br>(mismatches at the 1 <sup>st</sup> and 2 <sup>nd</sup> position)                   | TAATATGGACTAAAGGAGGCTTTTCTGCAGGTCGATCTAAATAAATTCGTTTTCAA<br>TGATTAATAATAGCATAGTCGGGTTTTCTTTTAGTTTCAGCTTTCCGCAAGT    |
| 3 bp tail<br>(mismatches at the 1 <sup>st</sup> , 2 <sup>nd</sup> and 3 <sup>rd</sup> position) | TAATATGGACTAAAGGAGGCTTTTCTGCAGGTCGATCTAAATAAATTCGTTTTCAA<br>TGATTAATAATAGCATAGTCGGGTTTTCTTTTAGTTTCAGCTTTCCGCATGT    |
| 1 mismatch at the 54 <sup>th</sup> position                                                     | TAATATGGACTAAAGGAGGCTTTTCTGCAGGTCGATCTAAATAAATTCGTTTTCTA<br>TGATTAATAATAGCATAGTCGGGTTTTCTTTTAGTTTCAGCTTTCCGCAACA    |
| 2 mismatches at 36 <sup>th</sup> and 72 <sup>nd</sup>                                           | TAATATGGACTAAAGGAGGCTTTTCTGCAGGTCGATGTAATAAATTCGTTTTCAA<br>TGATTAATAATAGCATACTCGGGTTTTCTTTTAGTTTCAGCTTTCCGCAACA     |
| 3 mismatches at the 27 <sup>th</sup> , 54 <sup>th</sup> and 88 <sup>th</sup>                    | TAATATGGACTAAAGGAGGCTTTTCTGGAGGTCGATCTAAATAAATTCGTTTTCTA<br>TGATTAATAATAGCATAGTCGGGTTTATCTTTTAGTTTCAGCTTTCCGCAACA   |
| 4 mismatches at the 22 <sup>nd</sup> , 44 <sup>th</sup> , 66 <sup>th</sup> and 88 <sup>th</sup> | TAATATGGACTAAAGGAGGCATTTCTGCAGGTCGATCTAAATTAATTCGTTTTCAA<br>TGATTAATTAGCATAGTCGGGTTTTCTTATAGTTTCAGCTTTCCGCAACA      |
| 3 bp insertion at the 9 <sup>th</sup>                                                           | TAATATGGACTAAAGGAGGCTTTTCTGCAGGTCGATCTAAATAAATTCGTTTTCAA<br>TGATTAATAATAGCATAGTCGGGTTTTCTTTTAGTTTCAGCTTCTTTCCGCAACA |
| 3 bp deletion at the 9 <sup>th</sup>                                                            | TAATATGGACTAAAGGAGGCTTTTCTGCAGGTCGATCTAAATAAATTCGTTTTCAA<br>TGATTAATAATAGCATAGTCGGGTTTTCTTTTAGTTTCAGTCCGCAACA       |
| 1 bp insertion at the 9 <sup>th</sup>                                                           | TAATATGGACTAAAGGAGGCTTTTCTGCAGGTCGATCTAAATAAATTCGTTTTCAA<br>TGATTAATAATAGCATAGTCGGGTTTTCTTTTAGTTTCAGCTTTTCCGCAACA   |
| 1 bp deletion at the 9 <sup>th</sup>                                                            | TAATATGGACTAAAGGAGGCTTTTCTGCAGGTCGATCTAAATAAATTCGTTTTCAA<br>TGATTAATAATAGCATAGTCGGGTTTTCTTTTAGTTTCAGCTTCCGCAACA     |
| 3 bp insertion at the 54 <sup>th</sup>                                                          | TAATATGGACTAAAGGAGGCTTTTCTGCAGGTCGATCTAAATAAATTCGTTTTCTT<br>TAATGATTAATAATAGCATAGTCGGGTTTTCTTTTAGTTTCAGCTTTCCGCAACA |

Table S2

|                                        |                                                                                                                                                                                                                                                                                                                                                                                                                                                  |
|----------------------------------------|--------------------------------------------------------------------------------------------------------------------------------------------------------------------------------------------------------------------------------------------------------------------------------------------------------------------------------------------------------------------------------------------------------------------------------------------------|
| 3 bp deletion at the 54 <sup>th</sup>  | TAATATGGACTAAAGGAGGCTTTTCTGCAGGTCGATCTAAATAAATTCGTTAATGA<br>TTAAATAGCATAGTCGGGTTTTCTTTAGTTTCAGCTTCCGCAACA                                                                                                                                                                                                                                                                                                                                        |
| URA3 promoter                          | CTTTTTTTGATTTTCGGTTTCTTTGAAATTTTTTTGATTCGGTAATCTCCGAACAGA<br>AGGAAGAACGAAGGAAGGAGCACAGACTTAGATTGGTATATATACGCATATGTA<br>GTGTTGAAGAAACATGAAATTGCCAGTATTCTTAACCCAAGTGCACAGAACAAA<br>AACCTGCAGGAAACGAAGATAAATC                                                                                                                                                                                                                                       |
| UR                                     | ATGTCGAAAGCTACATATAAGGAACGTGCTGCTACTCATCCTAGTCCTGTTGCTG<br>CCAAGCTATTTAATATCATGCACGAAAAGCAAACAACTTGTGTGCTTCATTGGAT<br>GTTTCGTACCACCAAGGAATTACTGGAGTTAGTTGAAGCATTAGGTCCCAAATTT<br>GTTTACTAAAAACACATGTGGATATCTTGACTGATTTTTCCATGGAGGGCACAGT<br>TAAGCCGCTAAAGGCATTATCCGCCAAGTACAATTTTTACTCTTTCGAAGACAGA<br>AAATTTGCTGACATTGGTAATACAGTCAAATTGCAGTACTCTGCGGGTGTATACA<br>GAATAGCAGAATGGGCAGACATTACGAATGCACACGGTGTGGTGGGCCAGGT<br>ATTGTTAGCGGTTTGA       |
| 5' splice donor (SD)                   | GTATGTTAATATGGACTAAAGGAGGCTTTTCTGCAGGTC                                                                                                                                                                                                                                                                                                                                                                                                          |
| Hocs                                   | GATCTAAATAAATTCGTTTTCAATGATTAATAATAGCATAGTCGGGTTTTCTTTAG<br>TTTCAGCTTCCGCAACAGTATAATTTTATAAACCTGGTTTTGGTTTTGTAGAGT<br>GGTT                                                                                                                                                                                                                                                                                                                       |
| 3' splice acceptor (SA)                | CCCGGTACCGAGCTCGAATTTTTACTAACAAATGGTATTATTTATAACAG                                                                                                                                                                                                                                                                                                                                                                                               |
| A3                                     | AGCAGGCGGCAGAAGAAGTAACAAAGGAACCTAGAGGCCTTTTTGATGTTAGCAG<br>AATTGTCATGCAAGGGCTCCCTATCTACTGGAGAATATACTAAGGGTACTGTTGA<br>CATTGCGAAGAGCGACAAAGATTTTTGTTATCGGCTTTATTGCTCAAAGAGACATG<br>GGTGAAGAGATGAAGGTTACGATTGGTTGATTATGACACCCGGTGTGGGTTTA<br>GATGACAAGGGAGACGCATTGGGTCAACAGTATAGAACCGTGGATGATGTGGTC<br>TCTACAGGATCTGACATTATTATTGTTGGAAGAGGACTATTTGCAAAGGGAAGGG<br>ATGCTAAGGTAGAGGGTGAACGTTACAGAAAAGCAGGCTGGGAAGCATATTTGA<br>GAAGATGCGGCCAGCAAACTAA |
| URA3 terminator                        | AAAAGTATTATAAGTAAATGCATGTATACTAAACTCACAAATTAGAGCTTCAAT<br>TTAATTATATCAGTTATTACCC                                                                                                                                                                                                                                                                                                                                                                 |
| recombining block (recipient sequence) | GTATGTTAATATGGACTAAAGGAGGCTTTTCTGCAGGTCGATCTAAATAAATTCG<br>TTTTCAATGATTAATAATAGCATAGTCGGGTTTTCTTTAGTTTCAGCTTCCGCA<br>ACA                                                                                                                                                                                                                                                                                                                         |
